# Supplementary material
Source: PubMed Central journal article supplement (PMC8159865)
Supplement: NIHMS1675457-supplement-1.pdf [file NIHMS1675457-supplement-1.pdf]

# SUPPLEMENTARY INFORMATION

## Synthetic Procedures

### Materials

Materials obtained from commercial suppliers were used without further purification. All other chemicals and reagents were purchased from Sigma Aldrich. Deuterated NMR solvents were purchased from Cambridge Isotope Laboratories.

### Instrumentation

NMR spectra were recorded on a Varian VX 500 MHz spectrometer or a Varian 400 MHz spectrometer. Mass spectra were recorded at UCSD Chemistry and Biochemistry Mass Spectrometry Facility utilizing an Agilent 6230 HR-ESI-TOF mass spectrometer. Reverse-phase HPLC purification (CLIQUEUS, C18, 5  $\mu$ m, 10 x 240 mm, Higgins analytical) and analysis (Eclipse, XDB-C18, 5  $\mu$ m, 4.6 x 150 mm) were carried out on an Agilent 1200 series instrument or Beckman Coulter System Gold 127P Solvent Module.

### Methods

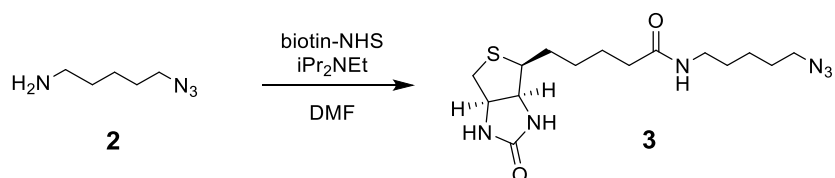

**Scheme 1.** Synthesis of biotin linker.

### Synthesis of biotin linker (3):

The synthesis for compound **2** has been previously reported<sup>1,2</sup>. Biotin-NHS (218 mg, 0.64 mmol) and *N,N*-diisopropylethylamine (111  $\mu$ L, 0.64 mmol) were added to a solution of **2** (0.58 mmol) in

DMF (800  $\mu\text{L}$ ). The reaction was stirred overnight at room temperature. The solvent was concentrated in vacuo then dissolved in  $\text{CH}_2\text{Cl}_2$  and washed with water and brine. The compound was purified on silica gel using methanol and  $\text{CH}_2\text{Cl}_2$  (60% yield).

$^1\text{H}$  NMR (500 MHz,  $\text{CD}_3\text{OD}$ ):  $\delta$  4.51 (m, 1H), 4.32 (m, 1H), 3.23 (m, 2H), 3.18 (m, 3H), 2.92 (dd,  $J=5.3$  Hz, 13.2 Hz, 1H), 2.74 (d,  $J=13.2$  Hz, 1H), 2.22 (t,  $J=7.4$  Hz, 2H), 1.69-1.39 (m, 12H).  $^{13}\text{C}$  NMR (126 MHz,  $\text{CD}_3\text{OD}$ )  $\delta$ : 174.62, 164.57, 62.09, 60.32, 55.64, 51.03, 39.83, 38.91, 35.50, 28.61, 28.42, 28.29, 28.09, 25.56, 23.83. HRMS ( $m/z$ ):  $[\text{M}+\text{Na}]^+$  calcd. for  $\text{C}_{15}\text{H}_{26}\text{N}_6\text{O}_2\text{S}$ , 377.1730; found, 377.1730.

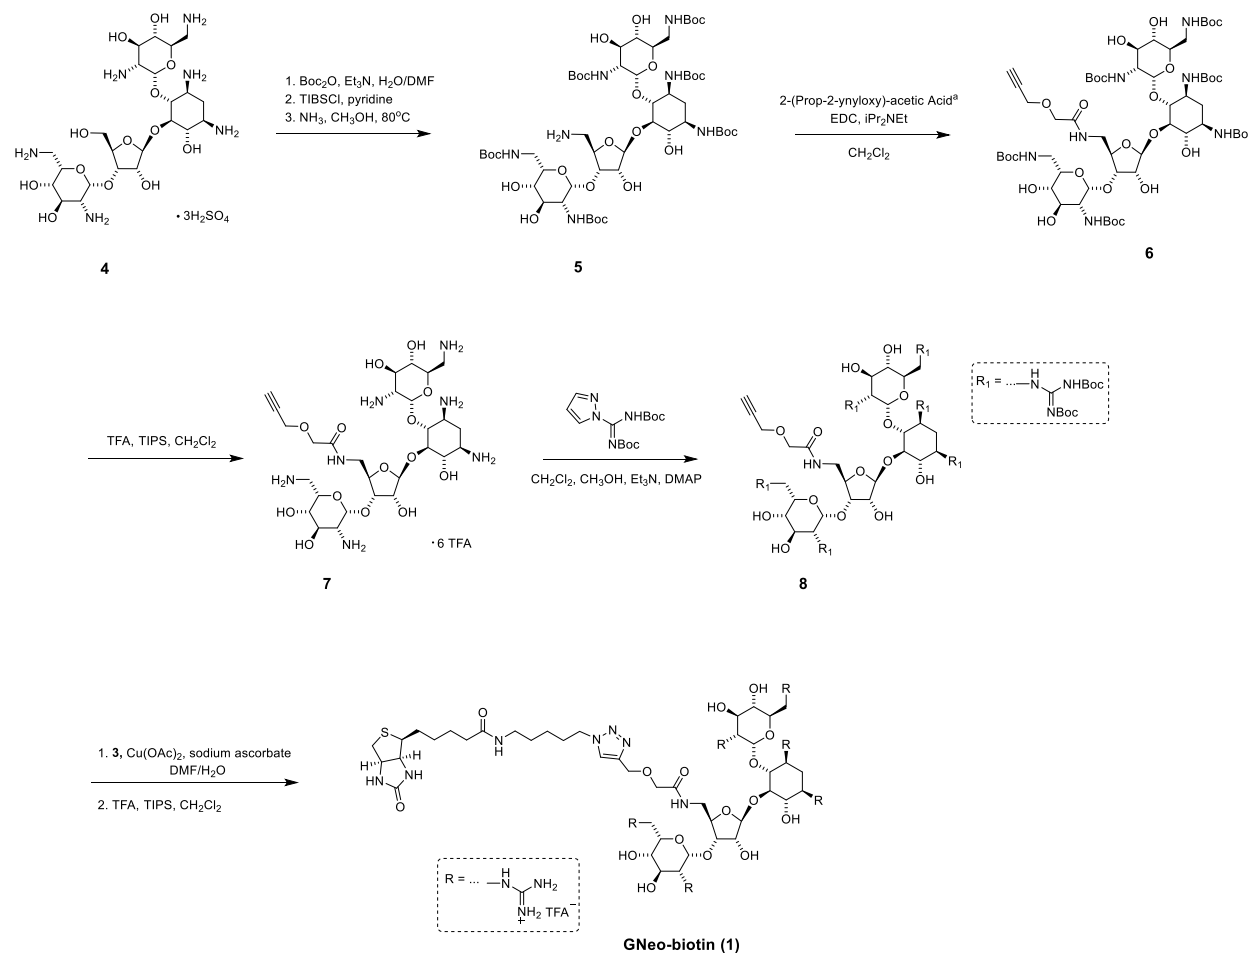

**Scheme 2.** Synthesis of GNeo-biotin.

Compound **5** was synthesized as previously reported <sup>2</sup>. Alkyne-acid linker [2-(prop-2-ynloxy)-acetic acid] was prepared as previously reported <sup>2</sup>.

### **Synthesis of BocNeo-alkyne derivative (6):**

1-Ethyl-3-(3-dimethylaminopropyl)carbodiimide (3.2 eq) was added to a solution of 2-(prop-2-ynloxy)-acetic acid (3.2 eq) in dichloromethane (CH<sub>2</sub>Cl<sub>2</sub>, 0.6 ml/mmol). The mixture was stirred for 30 min. A solution of **5** (1 eq) in CH<sub>2</sub>Cl<sub>2</sub> (0.2 mol/L) and *N,N*-diisopropylethylamine (3 eq) was then added dropwise. The mixture was then stirred for 48 h. The mixture was partitioned between CH<sub>2</sub>Cl<sub>2</sub> and 5% citric acid. The organic layer was separated and washed with sodium bicarbonate and brine. The organic layer was collected, dried over sodium sulfate, filtered off, and the filtrate was evaporated. Silica gel column chromatography (0-8% MeOH in CH<sub>2</sub>Cl<sub>2</sub>) afforded the desired product as a colorless amorphous (46% yield).

<sup>1</sup>H NMR (500 MHz, CD<sub>3</sub>OD): δ 6.59 (d, *J*=8.1 Hz, 1H), 5.37 (s, 1H), 5.11 (s, 1H), 4.35-4.30 (m, 4H), 4.18-4.11 (m, 3H), 3.96-3.89 (m, 3H), 3.75-3.36 (m, 15H), 3.19 (m, 3H), 2.97 (t, *J*=2.8 Hz, 1H), 1.96 (d, *J*=13.0, 1H), 1.47-1.43 (m, 54 H); <sup>13</sup>C NMR (126 MHz, CD<sub>3</sub>OD) δ: 170.62, 157.66, 157.45, 157.13, 156.94, 156.60, 156.49, 109.94, 98.89, 97.58, 85.67, 79.29, 79.05, 78.95, 78.91, 78.77, 78.52, 75.95, 74.14, 73.83, 73.22, 71.83, 71.43, 71.25, 70.27, 67.88, 67.68, 57.94, 55.45, 52.10, 51.10, 49.96, 41.16, 40.69, 34.47, 27.55, 27.45, 27.43, 27.39, 27.34. HRMS (*m/z*): [M+Na]<sup>+</sup> calcd. for C<sub>58</sub>H<sub>99</sub>N<sub>7</sub>O<sub>26</sub>, 1332.6532; found, 1332.6529.

### **Synthesis of Neo-alkyne (7):**

To a solution of **6** (1 eq) and triisopropylsilane (6.0 eq) in CH<sub>2</sub>Cl<sub>2</sub> (6.1 ml/mmol) was added trifluoroacetic acid (TFA, 6.1 ml/mmol) at room temperature. The mixture was stirred for 2 hours. The reaction was azeotroped in toluene 3 times and dissolved in water. The solution was washed with CH<sub>2</sub>Cl<sub>2</sub> (3 times) and lyophilized to give the desired product as a colorless amorphous (84% yield).

$^1\text{H}$  NMR (500 MHz,  $\text{D}_2\text{O}$ ):  $\delta$  5.79 (d,  $J=3.85$  Hz, 1H), 5.19 (d,  $J=3.34$  Hz, 1H), 5.08 (d,  $J=1.62$  Hz, 1H);  $^{13}\text{C}$  NMR (126 MHz,  $\text{D}_2\text{O}$ )  $\delta$ : 172.41, 163.26, 162.98, 162.70, 162.42, 119.65, 117.33, 115.01, 112.69, 109.86, 95.19, 94.58, 84.94, 79.56, 78.40, 77.21, 76.63, 74.87, 73.06, 72.16, 70.11, 69.65, 68.23, 67.90, 67.37, 67.01, 58.41, 52.94, 50.67, 49.42, 48.30, 40.68, 40.19, 39.79, 27.72.

### Synthesis of BocGNeo-alkyne (8):

A solution of **7** (1 eq) in MeOH (0.12 mol/L) was added to  $\text{CH}_2\text{Cl}_2$  (0.036 mol/L), triethylamine (15 eq) and *N,N'*-Di-Boc-1*H*-pyrazole-1-carboxamidine (15 eq), and 4-dimethylaminopyridine (1 eq) at ambient temperature. The mixture was stirred for 120 h. The mixture was partitioned between  $\text{CH}_2\text{Cl}_2$  and 5% citric acid. The organic layer was collected, dried over sodium sulfate, filtered off, and the filtrate was evaporated. Silica gel column chromatography (0-3% MeOH in  $\text{CH}_2\text{Cl}_2$ ) afforded the desired product as a colorless amorphous (63% yield).

$^1\text{H}$  NMR (500 MHz,  $\text{CD}_3\text{OD}$ ):  $\delta$  5.85 (d,  $J=3.89$  Hz, 1H), 5.08 (s, 1H), 5.02 (s, 1H), 4.58 (m, 1H), 4.39-4.32 (m, 3H), 4.28 (m, 1H), 4.16-4.08 (m, 3H), 3.92-3.85 (m, 4H), 3.77-3.69 (m, 3H), 3.54-3.48 (m, 2H), 3.22 (m, 1H), 2.25 (m, 1H), 1.59-1.4 (m, 108H);  $^{13}\text{C}$  NMR (126 MHz,  $\text{CD}_3\text{OD}$ )  $\delta$ : 170.55, 163.20, 162.92, 162.82, 162.76, 157.35, 156.57, 156.43, 156.13, 156.10, 153.29, 153.01, 152.78, 152.74, 152.60, 151.88, 151.79, 111.54, 97.92, 95.85, 87.30, 83.39, 83.31, 83.25, 83.22, 82.94, 82.66, 82.54, 81.58, 79.18, 79.13, 79.10, 79.08, 78.90, 78.84, 78.58, 78.39, 75.83, 75.65, 75.30, 74.19, 72.85, 72.19, 71.87, 70.58, 69.74, 68.13, 66.71, 58.24, 53.85, 51.59, 50.45, 48.76, 42.93, 41.34, 40.28, 33.85, 29.36, 27.44, 27.27, 27.16, 27.02, 26.97, 26.84, 26.81. HRMS (m/z):  $[\text{M}+2\text{H}]^{2+}$  calcd. for  $\text{C}_{94}\text{H}_{159}\text{N}_{19}\text{O}_{38}$ , 1082.0619; found, 1082.0631.

### Synthesis of GNeo-biotin (1):

**8** (0.046 mmol) and **3** (0.069 mmol) were dissolved in dimethylformamide (1 mL). Cu(II) sulfate hydrate (0.01 mmol) and sodium ascorbate (0.01 mmol) were added as a solution in  $\text{H}_2\text{O}$  (150  $\mu\text{L}$ ). The reaction was stirred overnight at room temperature under argon. The reaction was

diluted into CH<sub>2</sub>Cl<sub>2</sub> and washed with H<sub>2</sub>O and brine. The organic layer was dried over Na<sub>2</sub>SO<sub>4</sub> and concentrated in vacuo. The protected product was dissolved in CH<sub>2</sub>Cl<sub>2</sub> (1 mL) and treated with trifluoroacetic acid (1 mL) and triisopropylsilane (10 μL) for 2 hours at room temperature. The reaction was evaporated and azeotroped with toluene (3x) and purified on a C-18 reverse phase HPLC column [5-60% ACN (0.1% TFA) in H<sub>2</sub>O (0.1% TFA) over 18 min] (46% yield).

<sup>1</sup>H NMR (500 MHz, D<sub>2</sub>O): δ 8.01 (s, 1H), 5.69 (s, 1H), 5.05 (s, 1H), 4.99 (s, 1H), 4.54 (m, 1H), 4.39 (t, *J*=6.6 Hz, 2H), 4.33 (m, 2H), 4.29 (m, 1H), 4.06 (m, 4H), 3.99 (m, 1H), 3.73 (m, 3H), 3.64 (s, 1H), 3.56-3.35 (m, 13H), 3.25 (m, 1H), 3.09 (m, 2H), 2.93 (d, 1H, *J*=12.5 Hz), 2.71 (d, 1H, *J*=12.5 Hz), 2.15 (t, *J*=6.9 Hz, 3H), 1.85 (m, 2H), 1.71-1.50 (m, 8H), 1.30 (m, 2H), 1.19 (m, 3H); <sup>13</sup>C NMR: (126 MHz, D<sub>2</sub>O) δ 176.51, 172.22, 165.26, 163.43, 162.99, 162.71, 162.43, 157.63, 157.36, 157.26, 157.10, 157.02, 156.43, 143.05, 125.07, 119.76, 117.45, 115.13, 112.81, 110.68, 98.17, 95.98, 85.03, 79.35, 78.41, 77.12, 74.48, 73.40, 72.57, 71.89, 70.85, 69.37, 69.04, 68.63, 66.66, 63.67, 62.04, 60.20, 55.43, 55.36, 53.44, 51.93, 50.51, 50.30, 41.68, 41.60, 40.34, 39.65, 38.77, 35.42, 31.97, 28.92, 27.79, 27.67, 27.63, 25.13, 22.84. HRMS (m/z): [M+2H]<sup>2+</sup> calcd. for C<sub>49</sub>H<sub>89</sub>N<sub>25</sub>O<sub>16</sub>S, 658.8393; found, 658.8390.

## References:

- 1 Chouhan, G. & James, K. CuAAC macrocyclization: high intramolecular selectivity through the use of copper-tris(triazole) ligand complexes. *Org Lett* **13**, 2754-2757, doi:10.1021/ol200861f (2011).
- 2 Dix, A. V. *et al.* Cooperative, heparan sulfate-dependent cellular uptake of dimeric guanidinoglycosides. *ChemBiochem* **11**, 2302-2310, doi:10.1002/cbic.201000399 (2010).

# Supplementary Figures

## Gating Strategy

All cells analyzed by flow cytometry were gated using forward and side scattering as shown below.

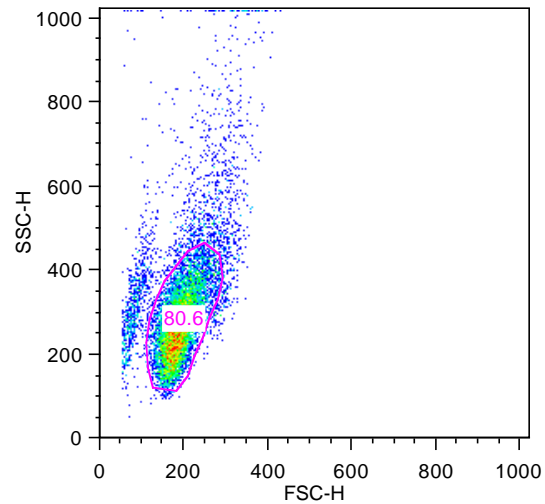

# Supplementary Tables

## Supplementary Table 1:

Disaccharide composition of A375 HS

| Disaccharide Structure      |                           | A375 Wildtype                                 | A375 <i>KDM2B</i> <sup>-/-</sup> |
|-----------------------------|---------------------------|-----------------------------------------------|----------------------------------|
| Structure Code <sup>a</sup> | Unit Formula <sup>b</sup> | Abundance (% Total Disaccharide) <sup>c</sup> |                                  |
| D0H0                        | DUA-GlcNH <sub>2</sub>    | -                                             | -                                |
| D0A0                        | DUA-GlcNAc                | 58.7 ± 0.5                                    | 57.9 ± 1.9                       |
| D0H6                        | DUA-GlcNH <sub>2</sub> 6S | -                                             | -                                |
| D2H0                        | DUA2S-GlcNH <sub>2</sub>  | -                                             | -                                |
| D0S0                        | DUA-GlcNS                 | 16.3 ± 0.1                                    | 18.0 ± 0.08                      |
| D0A6                        | DUA-GlcNAc6S              | 7.8 ± 0.5                                     | 9.8 ± 0.6                        |
| D2A0                        | DUA2S-GlcNAc              | 0.71 ± 0.5                                    | 0.26 ± 0.05                      |

|      |                             |           |           |
|------|-----------------------------|-----------|-----------|
| D2H6 | DUA2S-GlcNH <sub>2</sub> 6S | -         | -         |
| D0S6 | DUA-GlcNS6S                 | 5.7 ± 0.2 | 5.3 ± 0.3 |
| D2S0 | DUA2S-GlcNS                 | 5.8 ± 0.6 | 5.2 ± 0.3 |
| D2A6 | DUA2S-GlcAc6S               | -         | -         |
| D2S6 | DUA2S-GlcNS6S               | 4.9 ± 1.1 | 3.5 ± 0.6 |

<sup>a</sup> The disaccharide structure code is described in (Lawrence, et al. Nat. Methods 2008)

<sup>b</sup> DUA = 4,5-unsaturated uronic acid

<sup>c</sup> -, not detected

### Supplementary Table 2:

Sulfation and N-substitution of glucosamine units

| Unit                               | A375 Wildtype                         | A375 <i>KDM2B</i> <sup>-/-</sup> |
|------------------------------------|---------------------------------------|----------------------------------|
|                                    | <b>Constituents/100 disaccharides</b> |                                  |
| Unsubstituted glucosamine          | -                                     | -                                |
| <i>N</i> -acetylglucosamine        | 67 ± 1                                | 68 ± 1                           |
| <i>N</i> -sulfoglucosamine         | 33 ± 1                                | 32 ± 1                           |
| Uronyl-2- <i>O</i> -sulfates       | 11 ± 1                                | 9 ± 1                            |
| Glucosaminyl 6- <i>O</i> -sulfates | 18 ± 0.6                              | 19 ± 1                           |

### Supplementary Table 3:

qPCR Primer Sequences

| Primer (Human)  | Forward (5'-3')           | Reverse (5'-3')       |
|-----------------|---------------------------|-----------------------|
| <i>YWHAZ</i>    | CCTGCATGAAGTCTGTAAGTCTGAG | GACCTACGGGCTCCTACAACA |
| <i>KDM2B</i>    | GGGTCCCCTGATATTTTCGAGA    | GCTCCCCACTAGGAGTTTGAC |
| <i>SULF1</i>    | GAAGGAGAAGAGACGGCAGA      | CAGAAAGATCCCAGGTTCCA  |
| <i>HS6ST2</i>   | CCGTCCAGGAAGTCCACTA       | GACCAGTCATCGCCAGTGTA  |
| <i>HS3ST3A1</i> | CAGTGCCCTCTCCACCTC        | GCCAGGCAGTAGAAGACGTAA |
