# Supplementary material
Source: PubMed Central journal article supplement (PMC8159865)

**a**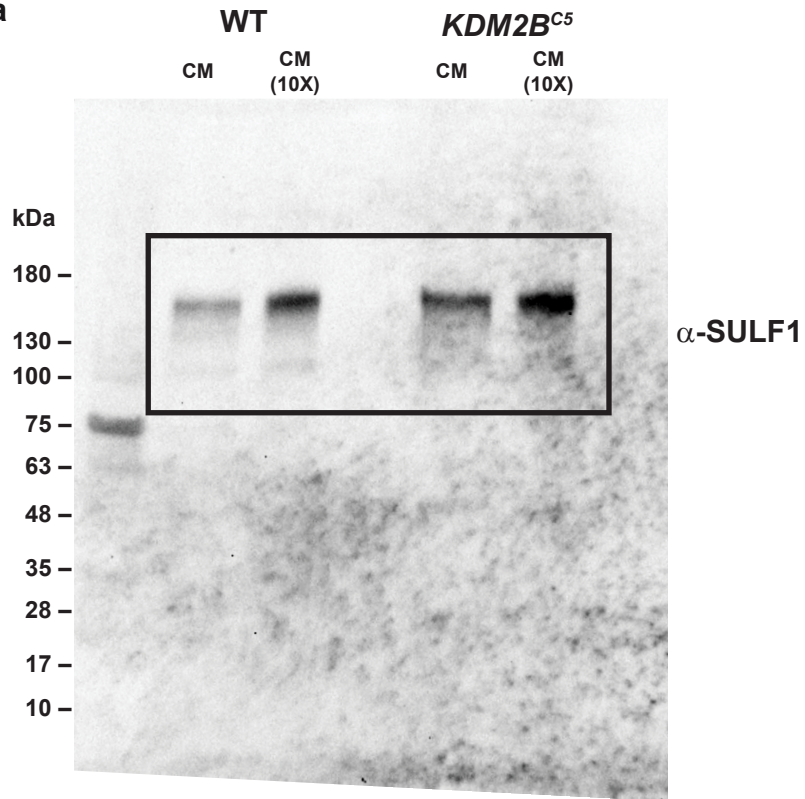**b**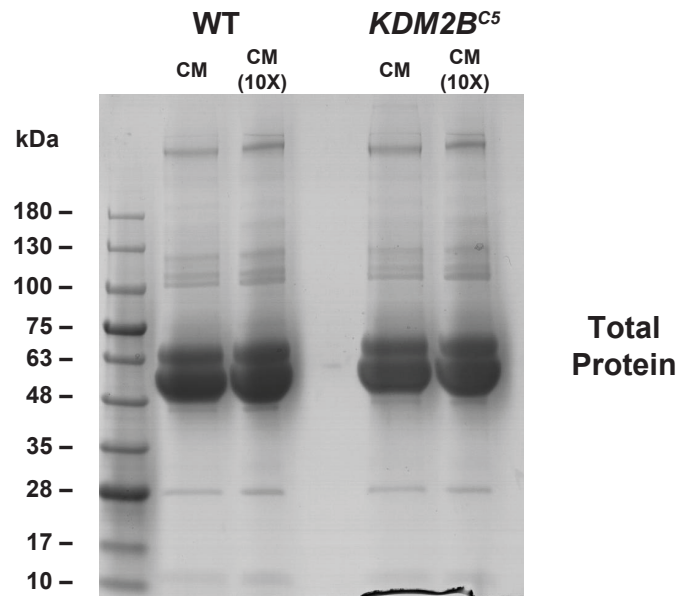

Supplement: NIHMS1675457-supplement-1675457_SourceData_ExtData_Fig4.pdf [file NIHMS1675457-supplement-1675457_SourceData_ExtData_Fig4.pdf]

kDa

**KDM2B**

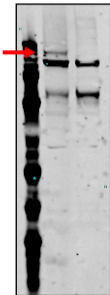

190

115

80

70

50

30

25

15

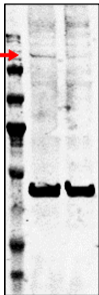

**$\beta$ -Actin**

Supplement: NIHMS1675457-supplement-1675457_SourceData_Fig3.pdf [file NIHMS1675457-supplement-1675457_SourceData_Fig3.pdf]
